# Supplementary material
Source: PubMed Central journal article supplement (PMC8108822)
Supplement: NIHMS1690177-supplement-Supplementary_Material.pdf [file NIHMS1690177-supplement-Supplementary_Material.pdf]

**Supplementary Appendix Table A1.** Summary of quality measures for Medicare Shared Savings Program (MSSP) Accountable Care Organizations (ACOs)

| <b>Domain</b>                                                   | <b>2014</b> | <b>2015</b> | <b>2016</b> | <b>Domain in Table 3</b>                      | <b>Specification</b>                       |
|-----------------------------------------------------------------|-------------|-------------|-------------|-----------------------------------------------|--------------------------------------------|
| Quality Measurement                                             |             |             |             |                                               |                                            |
| <b>Patient/Caregiver Experience</b>                             |             |             |             |                                               |                                            |
| ACO #1 Getting Timely Care, Appointments, and Information       | Yes         | Yes         | Yes         | CAHPS: Patients' Rating of Provider           |                                            |
| ACO #2 How Well Your Doctors Communicate                        | Yes         | Yes         | Yes         | CAHPS: Patients' Rating of Provider           |                                            |
| ACO #3 Patients' Rating of Doctor                               | Yes         | Yes         | Yes         | CAHPS: Patients' Rating of Provider           |                                            |
| ACO #4 Access to Specialists                                    | Yes         | Yes         | Yes         | CAHPS: Patients' Rating of Provider           |                                            |
| ACO #5 Health Promotion and Education                           | Yes         | Yes         | Yes         | CAHPS: Patients' Rating of Provider           |                                            |
| ACO #6 Shared Decision Making                                   | Yes         | Yes         | Yes         | CAHPS: Patients' Rating of Provider           |                                            |
| ACO #7 Health Status/Functional Status                          | Yes         | Yes         | Yes         |                                               | Not specific to the three study conditions |
| ACO #34 Stewardship of Patient Resources                        | No          | Yes         | Yes         |                                               | Measure changed over time                  |
| <b>Care Coordination/Patient Safety</b>                         |             |             |             |                                               |                                            |
| ACO #8 Risk Standardized, All Condition Readmissions            | Yes         | Yes         | Yes         | Risk Standardized, All Condition Readmissions |                                            |
| ACO #9 ASC Admissions: COPD or Asthma in Older Adults           | Yes         | Yes         | Yes         |                                               | Summary measure was chosen                 |
| ACO #10 ASC Admissions: Heart Failure                           | Yes         | Yes         | Yes         |                                               | Summary measure was chosen                 |
| ACO #11 Percent of PCPs who Qualified for EHR Incentive Payment | Yes         | Yes         | Yes         |                                               | Not specific to the three study conditions |
| ACO #12 Medication Reconciliation                               | Yes         | No          | No          |                                               | Measure changed over time                  |
| ACO #13 Falls: Screening for Fall Risk                          | Yes         | Yes         | Yes         | Preventive Care                               |                                            |

**Supplementary Appendix Table A1.** Continued

| <b>Domain</b>                                                                        | <b>2014</b> | <b>2015</b> | <b>2016</b> | <b>Domain in Table 3</b> | <b>Specification</b>                       |
|--------------------------------------------------------------------------------------|-------------|-------------|-------------|--------------------------|--------------------------------------------|
| Quality Measurement                                                                  |             |             |             |                          |                                            |
| <b>Care Coordination/Patient Safety</b>                                              |             |             |             |                          |                                            |
| ACO #35 Skilled Nursing Facility 30-Day All-Cause Readmission Measure (SNFRM)        | No          | Yes         | Yes         |                          | Measure changed over time                  |
| ACO #36 All-Cause Unplanned Admissions for Patients with Diabetes                    | No          | Yes         | Yes         |                          |                                            |
| ACO #37 All-Cause Unplanned Admissions for Patients with Heart Failure               | No          | Yes         | Yes         |                          |                                            |
| ACO #38 All-Cause Unplanned Admissions for Patients with Multiple Chronic Conditions | No          | Yes         | Yes         |                          |                                            |
| ACO #39 Documentation of Current Medications in the Medical Record                   | No          | Yes         | Yes         |                          |                                            |
| <b>Preventive Health</b>                                                             |             |             |             |                          |                                            |
| ACO #14 Influenza Immunization                                                       | Yes         | Yes         | Yes         | Preventive Care          |                                            |
| ACO #15 Pneumococcal Vaccination                                                     | Yes         | Yes         | Yes         | Preventive Care          |                                            |
| ACO #16 Adult Weight Screening and Follow-up                                         | Yes         | Yes         | Yes         |                          | Not specific to the three study conditions |
| ACO #17 Tobacco Use Assessment and Cessation Intervention                            | Yes         | Yes         | Yes         | Preventive Care          |                                            |
| ACO #18 Depression Screening                                                         | Yes         | Yes         | Yes         | Preventive Care          |                                            |
| ACO #19 Colorectal Cancer Screening                                                  | Yes         | Yes         | Yes         | Preventive Care          |                                            |
| ACO #20 Mammography Screening                                                        | Yes         | Yes         | Yes         | Preventive Care          |                                            |
| ACO #21 Proportion of Adults who had blood pressure screened in past 2 years         | Yes         | Yes         | Yes         |                          | Summary measure was chosen                 |
| ACO #42 Statin Therapy for the Prevention and Treatment of Cardiovascular Disease    | No          | No          | Yes         |                          | Measure changed over time                  |

**Supplementary Appendix Table A1. Continued**

| <b>Domain</b>                                                                                   | <b>2014</b> | <b>2015</b> | <b>2016</b> | <b>Domain in Table 3</b>   | <b>Specification</b>      |
|-------------------------------------------------------------------------------------------------|-------------|-------------|-------------|----------------------------|---------------------------|
| Quality Measurement                                                                             |             |             |             |                            |                           |
| <b>Clinical Care for At-Risk Population: Diabetes</b>                                           |             |             |             |                            |                           |
| ACO #22 Hemoglobin A1c Control (HbA1c) <8 percent                                               | Yes         | No          | No          |                            | Measure changed over time |
| ACO #23 Low Density Lipoprotein (LDL) <100mg/dL                                                 | Yes         | No          | No          |                            |                           |
| ACO #24 Blood Pressure (BP) <140/90                                                             | Yes         | No          | No          |                            |                           |
| ACO #25 Tobacco Non Use                                                                         | Yes         | No          | No          |                            |                           |
| ACO #26 Aspirin Use                                                                             | Yes         | No          | No          |                            |                           |
| ACO #27 Percent of beneficiaries with diabetes whose HbA1c in poor control (>9 percent)         | Yes         | Yes         | Yes         | Chronic disease management |                           |
| ACO #40 Depression Remission at Twelve Months                                                   | No          | Yes         | Yes         |                            | Measure changed over time |
| ACO #41 Diabetes--Eye Exam                                                                      | No          | Yes         | Yes         |                            |                           |
| <b>Clinical Care for At-Risk Population: Hypertension</b>                                       |             |             |             |                            |                           |
| ACO #28 Percent of beneficiaries with hypertension whose BP<140/90                              | Yes         | Yes         | Yes         | Chronic disease management |                           |
| <b>Clinical Care for At-Risk Population: IVD</b>                                                |             |             |             |                            |                           |
| ACO #29 Percent of beneficiaries with IVD with complete lipid profile and LDL control <100mg/dl | Yes         | No          | No          |                            | Measure changed over time |
| ACO #30 Percent of beneficiaries with IVD who use Aspirin or other antithrombotic               | Yes         | Yes         | Yes         | Medication Management      |                           |
| <b>Clinical Care for At-Risk Population: HF</b>                                                 |             |             |             |                            |                           |
| ACO #31 Beta-Blocker Therapy for LVSD                                                           | Yes         | Yes         | Yes         | Medication Management      |                           |
| <b>Clinical Care for At-Risk Population: CAD</b>                                                |             |             |             |                            |                           |
| ACO #32 Drug Therapy for Lowering LDL Cholesterol                                               | Yes         | No          | No          |                            | Measure changed over time |
| ACO #33 ACE Inhibitor or ARB Therapy for Patients with CAD and Diabetes and/or LVSD             | Yes         | Yes         | Yes         | Medication Management      |                           |

**Supplementary Appendix Table A2.** Quality of care of Accountable Care Organizations (ACOs) by tertile of nurse practitioner (NP) involvement

| ACO quality of care measure                                                     | T1                  | T2                 | T3                 | p value <sup>†</sup> |
|---------------------------------------------------------------------------------|---------------------|--------------------|--------------------|----------------------|
|                                                                                 | Mean ± STD (Median) |                    |                    |                      |
| <b>Patient and Caregiver Experience</b>                                         |                     |                    |                    |                      |
| Getting Timely Care, Appointments, and Information                              | 79.5 ± 3.8 (80.0)   | 80.0 ± 3.7 (80.0)  | 80.6 ± 3.7 (80.8)  | 0.0035               |
| How Well Your Doctors Communicate                                               | 92.2 ± 2.0 (92.6)   | 92.5 ± 1.5 (92.8)  | 92.7 ± 1.9 (93.0)  | 0.0013               |
| Patients' Rating of Doctor                                                      | 91.4 ± 2.0 (91.8)   | 91.9 ± 1.6 (92.1)  | 92.0 ± 1.7 (92.2)  | 0.0015               |
| Access to Specialists                                                           | 83.5 ± 2.6 (83.7)   | 83.6 ± 2.3 (83.6)  | 83.8 ± 2.5 (84.1)  | 0.2102               |
| Health Promotion and Education                                                  | 59.3 ± 3.9 (59.5)   | 59.0 ± 3.9 (59.0)  | 59.2 ± 3.8 (59.2)  | 0.6403               |
| Shared Decision Making                                                          | 74.8 ± 2.6 (75.0)   | 74.8 ± 2.5 (74.9)  | 75.1 ± 2.7 (75.3)  | 0.1229               |
| <b>Risk Standardized, All Condition Readmission</b>                             | 15.0 ± 0.8 (15.0)   | 14.9 ± 0.7 (14.8)  | 14.7 ± 0.7 (14.7)  | <.0001               |
| <b>Preventive Care</b>                                                          |                     |                    |                    |                      |
| Falls: Screening for Fall Risk                                                  | 54.1 ± 22.7 (55.9)  | 53.9 ± 22.6 (54.4) | 60.8 ± 21.8 (63.6) | 0.0010               |
| Influenza Immunization                                                          | 60.9 ± 17.1 (62.1)  | 63.2 ± 14.5 (65.0) | 65.4 ± 11.9 (65.9) | 0.0015               |
| Pneumococcal Vaccination                                                        | 56.4 ± 19.5 (59.1)  | 63.2 ± 17.6 (65.8) | 70.3 ± 15.0 (72.3) | <.0001               |
| Tobacco Use Assessment and Cessation Intervention                               | 87.8 ± 12.9 (92.2)  | 89.5 ± 11.7 (92.9) | 91.5 ± 7.7 (93.5)  | 0.0001               |
| Depression Screening                                                            | 47.4 ± 23.0 (47.7)  | 44.4 ± 23.3 (44.5) | 48.4 ± 22.7 (48.8) | 0.5960               |
| Colorectal Cancer Screening                                                     | 56.6 ± 15.2 (58.1)  | 59.5 ± 14.3 (61.2) | 62.3 ± 12.4 (63.8) | <.0001               |
| Mammography Screening                                                           | 62.4 ± 14.5 (63.0)  | 64.2 ± 13.5 (65.1) | 68.7 ± 11.3 (69.7) | <.0001               |
| <b>Chronic disease management</b>                                               |                     |                    |                    |                      |
| Percent of beneficiaries with diabetes whose HbA1c in poor control (>9 percent) | 22.4 ± 13.8 (19.1)  | 19.0 ± 10.4 (17.1) | 17.5 ± 8.5 (15.5)  | <.0001               |
| Percent of beneficiaries with hypertension whose BP<140/90                      | 69.1 ± 10.1 (70.3)  | 69.6 ± 9.1 (70.2)  | 69.8 ± 6.7 (70.2)  | 0.3555               |

| ACO quality of care measure                                                 | T1                 | T2                 | T3                 | p value <sup>†</sup> |
|-----------------------------------------------------------------------------|--------------------|--------------------|--------------------|----------------------|
| Medication management                                                       |                    |                    |                    |                      |
| Percent of beneficiaries with IVD who use Aspirin or other antithrombotic   | 79.6 ± 15.6 (83.3) | 84.0 ± 11.6 (86.3) | 86.6 ± 8.4 (88.3)  | <.0001               |
| Beta-Blocker Therapy for LVSD                                               | 85.3 ± 16.5 (90.0) | 87.5 ± 11.0 (90.0) | 88.0 ± 10.5 (89.7) | 0.0164               |
| ACE Inhibitor or ARB Therapy for Patients with CAD and Diabetes and/or LVSD | 76.2 ± 14.2 (78.5) | 77.6 ± 10.5 (78.9) | 79.4 ± 9.2 (80.3)  | 0.0016               |

<sup>†</sup>The association between NP involvement tertile and each ACO characteristic was analyzed using the generalized estimating equations models adjusted for year with multinomial distribution and cumulative logit link function. HbA1c, hemoglobin A1c; BP, blood pressure; IVD, intravascular disease; LVSD, left ventricular systolic dysfunction; ACE, angiotensin converting enzyme; ARB, angiotensin receptor blocker; CAD, coronary artery disease

**Supplementary Appendix Table A3.** Taxonomy codes for nurse practitioners (NPs) in primary care

| <b>Taxonomy code</b> | <b>Description</b> |
|----------------------|--------------------|
| 363L00000X           | Nurse Practitioner |
| 363LA2200X           | NP-Adult Health    |
| 363LF0000X           | NP-Family          |
| 363LG0600X           | NP-Gerontology     |
| 363LP2300X           | NP-Primary Care    |
| 363LW0102X           | NP-Women's Health  |

**Supplementary Appendix Table A4.** Current Procedural Terminology (CPT) codes for evaluation and management services

| <b>CPT</b>    | <b>CPT description</b>                                                                                             |
|---------------|--------------------------------------------------------------------------------------------------------------------|
| 98960 - 98962 | Education and Training for Patient Self-Management                                                                 |
| 98966 - 98969 | Non-Face-to-Face Nonphysician Services                                                                             |
| 99078         | Physician or other qualified health care professional educational services rendered to patients in a group setting |
| 99091 - 99457 | Non-Face-to-Face Physician Services                                                                                |
| 99201 - 99215 | Office or Other Outpatient Services                                                                                |
| 99217 - 99226 | Hospital Observation Services                                                                                      |
| 99221 - 99239 | Hospital Inpatient Services                                                                                        |
| 99241 - 99255 | Consultations                                                                                                      |
| 99281 - 99288 | Emergency Department Services                                                                                      |
| 99291 - 99292 | Critical Care Services                                                                                             |
| 99304 - 99318 | Nursing Facility Services                                                                                          |
| 99324 - 99337 | Domiciliary, Rest Home (eg, Boarding Home), or Custodial Care Services                                             |
| 99339 - 99340 | Domiciliary, Rest Home (eg, Assisted Living Facility), or Home Care Plan Oversight Services                        |
| 99341 - 99350 | Home Services                                                                                                      |
| 99354 - 99416 | Prolonged Services                                                                                                 |
| 99366 - 99368 | Case Management Services                                                                                           |
| 99374 - 99380 | Care Plan Oversight Services                                                                                       |
| 99381 - 99429 | Preventive Medicine Services                                                                                       |
| 99450 - 99456 | Special Evaluation and Management Services                                                                         |
| 99460 - 99463 | Newborn Care Services                                                                                              |
| 99464 - 99465 | Delivery/Birthing Room Attendance and Resuscitation Services                                                       |
| 99466 - 99486 | Inpatient Neonatal Intensive Care Services and Pediatric and Neonatal Critical Care Services                       |
| 99483 - 99483 | Cognitive Assessment and Care Plan Services                                                                        |
| 99484 - 99484 | General Behavioral Health Integration Care Management                                                              |
| 99487 - 99491 | Care Management Services                                                                                           |
| 99492 - 99494 | Psychiatric Collaborative Care Management Services                                                                 |
| 99495 - 99496 | Transitional Care Management Services                                                                              |
| 99497 - 99498 | Advanced Care Planning                                                                                             |
| 99499 - 99499 | Other Evaluation and Management Services                                                                           |

**Supplementary Appendix Table A5.** Influence of nurse practitioner (NP) involvement on characteristics of quality of care for Accountable Care Organizations (ACOs)

| Variable                                                          | Patient and Caregiver Experience | Risk Standardized, All Condition Readmission | Preventive Care | Chronic disease management | Medication management |
|-------------------------------------------------------------------|----------------------------------|----------------------------------------------|-----------------|----------------------------|-----------------------|
|                                                                   |                                  |                                              | Beta (SE)       |                            |                       |
| NP Involvement                                                    |                                  |                                              |                 |                            |                       |
| T3                                                                | reference                        | reference                                    | reference       | reference                  | reference             |
| T2                                                                | -0.07 (0.138)                    | 0.16 (0.056)*                                | -2.38 (0.805)*  | -1.07 (0.591)              | -0.85 (0.849)         |
| T1                                                                | 0.14 (0.194)                     | 0.15 (0.070)*                                | -1.51 (1.134)   | -1.23 (0.849)              | -1.71 (1.109)         |
| ACO Size                                                          |                                  |                                              |                 |                            |                       |
| ≤ 10,000 beneficiaries                                            | reference                        | reference                                    | reference       | reference                  | reference             |
| 10,001-20,000 beneficiaries                                       | -0.16 (0.144)                    | 0.08 (0.056)                                 | -0.03 (0.888)   | 0.77 (0.648)               | 0.85 (0.825)          |
| > 20,000 beneficiaries                                            | 0.26 (0.170)                     | 0.07 (0.068)                                 | 0.79 (1.165)    | 0.66 (0.663)               | 0.92 (0.856)          |
| Participate in Advance Payment Model                              |                                  |                                              |                 |                            |                       |
| No                                                                | reference                        | reference                                    | reference       | reference                  | reference             |
| Yes                                                               | 0.45 (0.254)                     | 0.07 (0.080)                                 | 2.70 (2.386)    | 2.40 (1.045)*              | 0.81 (1.683)          |
| Number of years in MSSP                                           | 0.16 (0.043)*                    | -0.08 (0.017)*                               | 4.20 (0.284)*   | 1.36 (0.215)*              | 1.56 (0.266)*         |
| Primary care MD PCE per 10,000 beneficiaries                      | 0.01 (0.005)                     | -0.0004 (0.002)                              | -0.02 (0.031)   | 0.02 (0.020)               | -0.01 (0.022)         |
| Primary care PA PCE per 10,000 beneficiaries                      | -0.15 (0.143)                    | 0.05 (0.061)                                 | -0.08 (0.855)   | -0.41 (0.694)              | -0.35 (0.633)         |
| Specialist <sup>§</sup> PCE per 10,000 beneficiaries              | 0.03 (0.016)*                    | 0.01 (0.006)*                                | 0.26 (0.093)*   | 0.08 (0.064)               | 0.18 (0.091)          |
| Average age of beneficiaries                                      | 0.05 (0.125)                     | 0.11 (0.042)*                                | 2.03 (0.757)*   | 0.81 (0.491)               | -0.05 (0.719)         |
| % Male                                                            | -0.15 (0.037)*                   | 0.02 (0.011)*                                | -0.49 (0.195)*  | -0.14 (0.170)              | -0.10 (0.177)         |
| % Dual eligible                                                   | -0.0001 (0.010)                  | -0.002 (0.003)                               | 0.03 (0.058)    | 0.03 (0.036)               | -0.08 (0.069)         |
| % Minority                                                        | -0.04 (0.009)*                   | -0.001 (0.003)                               | -0.15 (0.054)*  | -0.16 (0.032)*             | -0.07 (0.051)         |
| % DM                                                              | 0.02 (0.019)                     | 0.02 (0.007)*                                | -0.05 (0.121)   | 0.17 (0.079)*              | 0.01 (0.092)          |
| % HF                                                              | -0.04 (0.034)                    | 0.03 (0.011)*                                | -0.97 (0.198)*  | -0.58 (0.142)*             | -0.28 (0.180)         |
| % COPD                                                            | -0.004 (0.023)                   | -0.001 (0.008)                               | 0.34 (0.152)*   | 0.03 (0.101)               | 0.17 (0.142)          |
| Total number of ESRD/disabled person-years per 1,000 person-years | -0.0005 (0.004)                  | 0.005 (0.001)*                               | 0.04 (0.024)    | -0.004 (0.016)             | 0.01 (0.026)          |

\*P-value < 0.05; NP, nurse practitioner; ACO, accountable care organization; MSSP, Medicare Shared Savings Program; MD, doctor of medicine; PCE, proportion of clinical effort; PA, physician assistant; DM, diabetes mellitus; HF, heart failure; COPD, chronic obstructive pulmonary disease, ESRD, end stage renal disease.
